# Supplementary material
Source: PubMed Central journal article supplement (PMC5311413)
Supplement: AEM.02684-16_zam999117688s1.pdf [file AEM.02684-16_zam999117688s1.pdf]

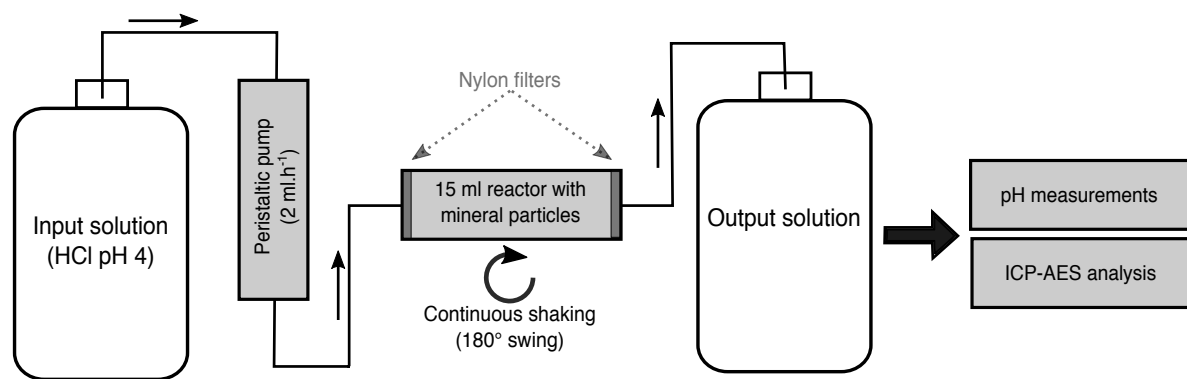

**Fig.S1 Scheme of the experimental set up used in the abiotic mineral weathering experiment.** Reactors contained 3 g of calcite or apatite or obsidian particles. The reactors were placed on a rack revolving over 180° in 2 s. At both extremities of the reactors, 0.5  $\mu\text{m}$  nylon filters were placed to avoid mineral particles loss. A flow rate of 2 ml.h<sup>-1</sup> was maintained by a peristaltic pump.

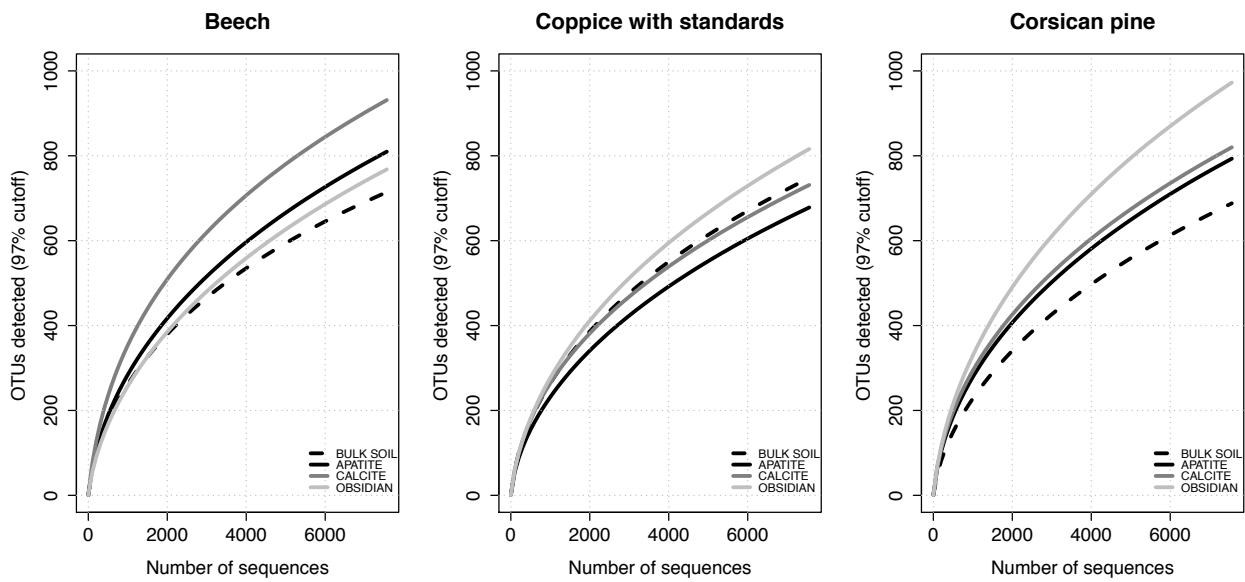

Fig.S2 Rarefaction curves indicating the number of operational taxonomic units (OTUs) at a genetic distance of 3% according to pyrosequencing data analyses, under beech, coppice with standards and corsican pine stands. Dotted lines refer to bulk soil samples and full lines to minerals samples.

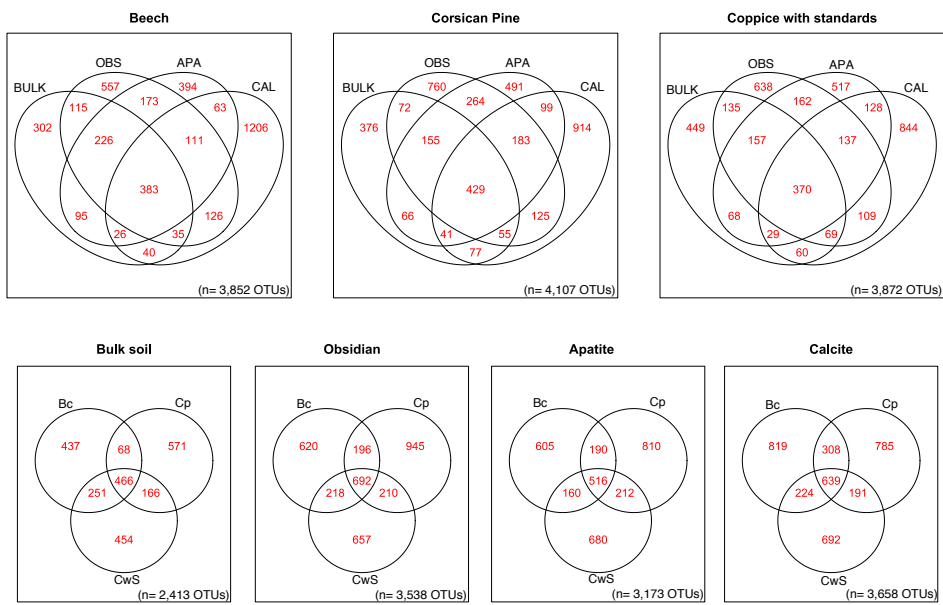

**Fig.S3A Venn diagrams of the shared 16S rRNA gene based OTUs between the different sample types under a same tree stand and between the different tree stands for a same sample type.** The number of OTUs (n) in each group is indicated. BULK: bulk soil, OBS: obsidian, APA: apatite, CAL: calcite; Bc: beech; Cp: corsican pine and CwS: coppice with standards.

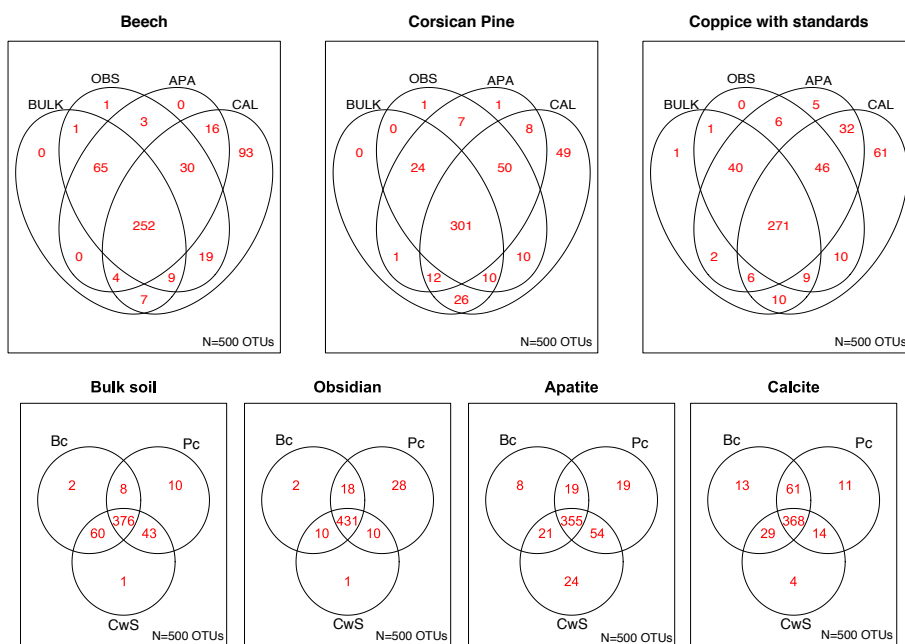

**Fig.S3B Venn diagrams of the top 500 OTUs between the different sample types under a same tree stand and between the different tree stands for a same sample type.** BULK: bulk soil, OBS: obsidian, APA: apatite, CAL: calcite; Bc: beech; Cp: corsican pine and CwS: coppice with standards.

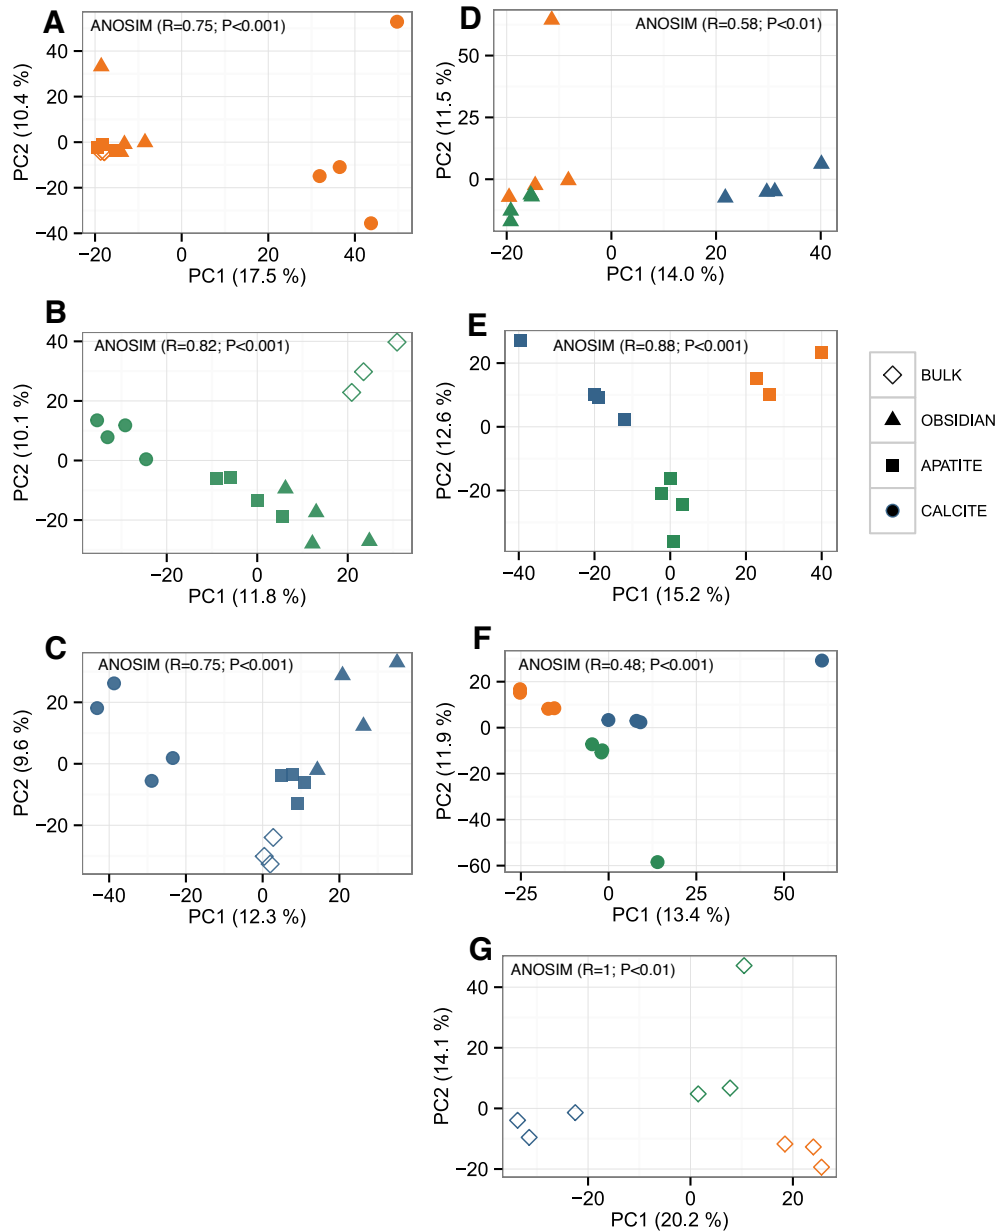

**Fig.S4 Multivariate analysis of the bacterial communities based on the relative abundance of bacterial OTUs estimated by 16S rRNA gene pyrosequencing analysis.** Multivariate analysis was conducted separately for each tree stand: A) beech, B) coppice with standards and C) corsican pine. The same analysis was conducted for each mineral type excluding the bulk soil samples: D) obsidian, E) apatite and F) calcite. At last, comparison of the bulk soil sample was done and is presented in panel G. For legibility the samples are presented as follow: beech (orange), coppice with standards (green) and corsican pine (blue) stands, calcite samples (round), apatite samples (square), obsidian samples (triangle) and bulk soil samples (open diamond). The percentages of the total variance explained by the first two axes PC1 and PC2 are presented on each graph. ANOSIM analyses have been done for each dataset presented in the different panels.

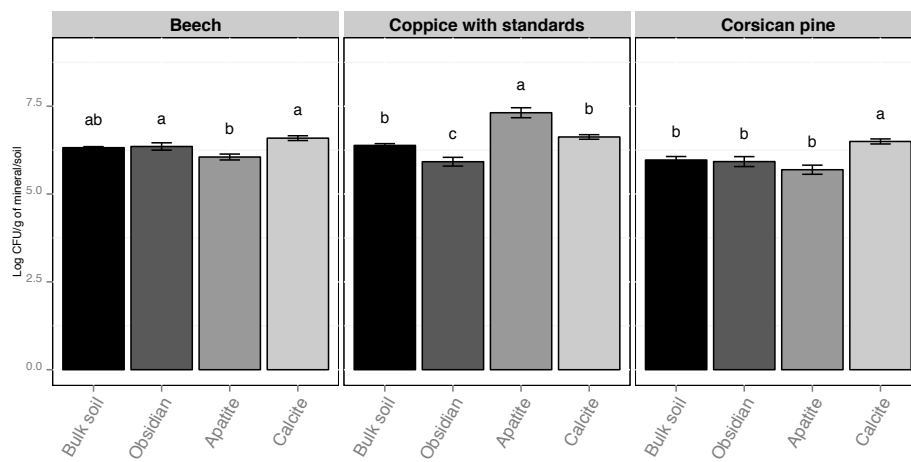

**Fig.S5 Density of the culturable bacterial communities from bulk soil and mineral samples.** Densities were expressed as log<sub>10</sub> CFU g<sup>-1</sup> dry weight of soil/mineral +/- sem, under beech, coppice with standards and corsican pine stands. Under a same tree stand, error bars with different letters are significantly different according to a one-factor ANOVA and a Tukey post hoc test (P < 0.05).

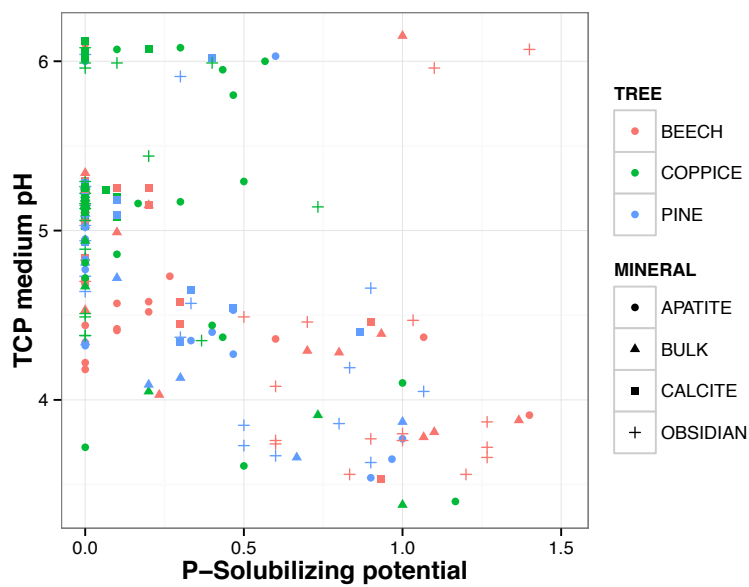

**Fig.S6 Relationship between inorganic phosphorus solubilization and TCP medium acidification.** Bacterial strains were grown 4 days at 25°C and medium acidification was estimated with Bromocresol green. The origin of the samples is presented as follow: beech (red), coppice with standards (green) and corsican pine (blue) stands, calcite samples (square), apatite samples (round), obsidian samples (cross) and bulk soil samples (triangle).

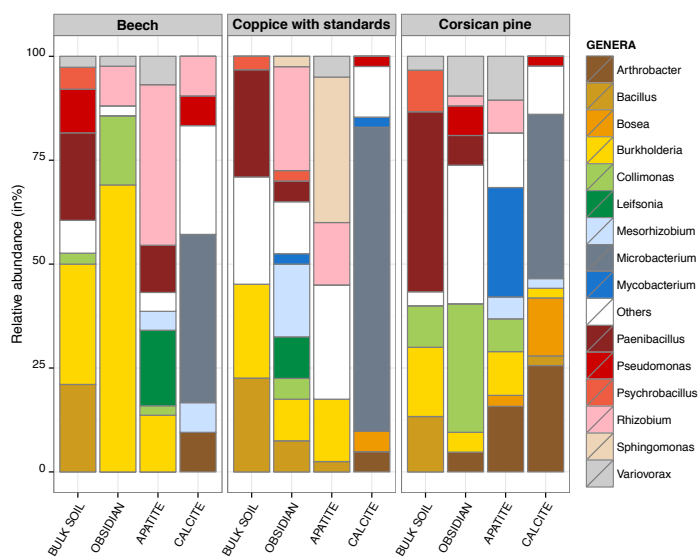

**Fig.S7** Relative distribution of the partial 16S rRNA gene sequences of bacterial isolates at the genus level. For each treatment, the data presented are the mean of 3 independent replicates. Genera containing few representatives were grouped under the category "Others".



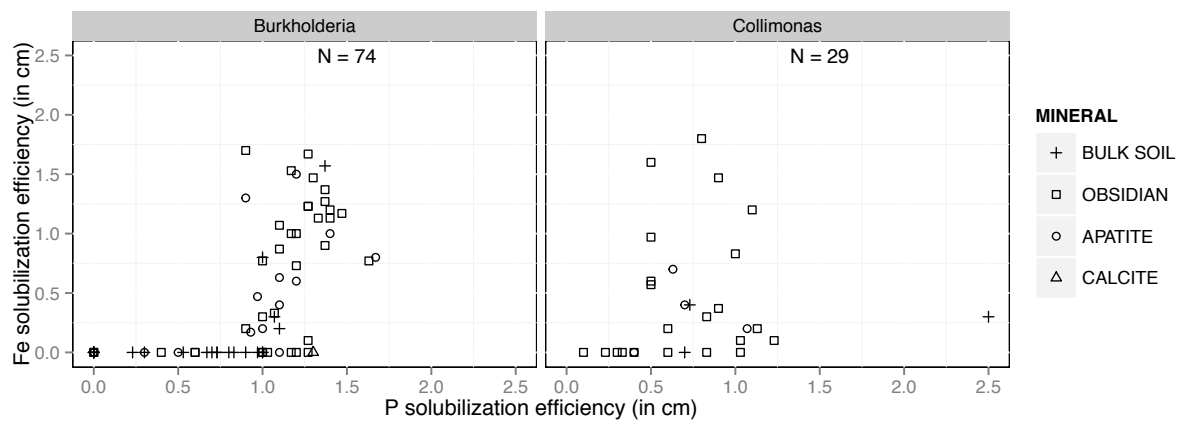

Fig.S8 Relationship between P- solubilization and Fe-mobilisation among bacterial strains that affiliated the *Burkholderia* and *Collimonas* genera.

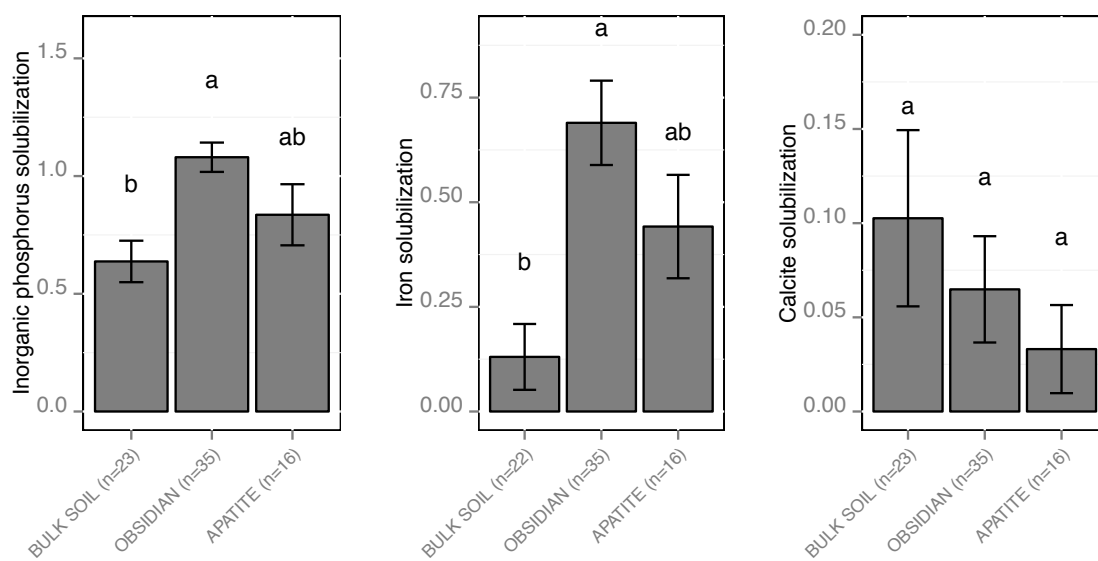

**Fig.S9** Relative efficacy of *Burkholderia* isolates to solubilise phosphorus and calcite and to mobilise iron according to their sample origin. One-factor ANOVA analysis was carried out to compare efficacies within a same tree stand. Different letters indicate significant differences ( $P < 0.05$ ).

**Table.S1. Relative abundance (in %) of the major bacterial genera (>0.25%) that varied significantly between bulk soil and mineral samples for each tree stands. Each value is the mean of biological replicates (± Standard Error of the Mean).**

| Phylum          | Genus             | BEECH              |                        |                       |                       |             | COPPICE            |                        |                       |                       |             | PINE               |                        |                       |                       |      |
|-----------------|-------------------|--------------------|------------------------|-----------------------|-----------------------|-------------|--------------------|------------------------|-----------------------|-----------------------|-------------|--------------------|------------------------|-----------------------|-----------------------|------|
|                 |                   | BULK<br>mean ± sem | OBSIDIAN<br>mean ± sem | APATITE<br>mean ± sem | CALCITE<br>mean ± sem | pval        | BULK<br>mean ± sem | OBSIDIAN<br>mean ± sem | APATITE<br>mean ± sem | CALCITE<br>mean ± sem | pval        | BULK<br>mean ± sem | OBSIDIAN<br>mean ± sem | APATITE<br>mean ± sem | CALCITE<br>mean ± sem | pval |
| Acidobacteria   | Gp1               | 13.41 ± 0.97       | 5.48 ± 0.44            | 7.04 ± 1.66           | 0.58 ± 0.11           | ***         | 8.99 ± 0.90        | 5.26 ± 0.98            | 2.22 ± 0.88           | 0.52 ± 0.18           | ***         | 6.74 ± 1.29        | 5.35 ± 0.61            | 4.46 ± 1.49           | 1.19 ± 0.38           | ***  |
|                 | Gp10              | 0.30 ± 0.21        | 0.10 ± 0.02            | 0.20 ± 0.05           | 0.16 ± 0.07           |             | 0.49 ± 0.26        | 0.24 ± 0.13            | 0.10 ± 0.06           | 0.01 ± 0.01           | *           | 0.74 ± 0.23        | 0.79 ± 0.12            | 1.04 ± 0.52           | 0.10 ± 0.04           | *    |
|                 | Gp2               | 25.63 ± 1.63       | 3.55 ± 0.64            | 5.36 ± 0.76           | 0.52 ± 0.07           | ***         | 13.35 ± 5.84       | 2.80 ± 0.59            | 1.12 ± 0.47           | 0.46 ± 0.17           | ***         | 17.46 ± 6.70       | 6.59 ± 0.69            | 4.73 ± 1.13           | 2.32 ± 0.85           | ***  |
|                 | Gp3               | 0.95 ± 0.10        | 0.17 ± 0.08            | 0.29 ± 0.09           | 0.02 ± 0.01           | ***         | 0.69 ± 0.29        | 0.18 ± 0.02            | 0.06 ± 0.02           | 0.03 ± 0.00           | ***         | 0.63 ± 0.28        | 0.42 ± 0.04            | 0.32 ± 0.12           | 0.15 ± 0.08           | ***  |
|                 | Bryobacter        | 0.88 ± 0.07        | 0.58 ± 0.15            | 0.69 ± 0.14           | 1.11 ± 0.17           |             | 0.55 ± 0.19        | 0.40 ± 0.04            | 0.37 ± 0.20           | 0.74 ± 0.12           | ***         | 0.51 ± 0.09        | 0.80 ± 0.03            | 0.61 ± 0.07           | 0.71 ± 0.15           | *    |
|                 | Gp5               | 0.19 ± 0.06        | 0.08 ± 0.03            | 0.08 ± 0.04           | 0.29 ± 0.03           | *           | 0.04 ± 0.04        | 0.03 ± 0.01            | 0.03 ± 0.03           | 0.04 ± 0.04           |             | 0.13 ± 0.02        | 0.12 ± 0.03            | 0.03 ± 0.01           | 0.05 ± 0.03           | *    |
|                 | Gp7               | 0.00 ± 0.00        | 0.00 ± 0.00            | 0.02 ± 0.02           | 1.50 ± 1.34           |             | 0.02 ± 0.01        | 0.00 ± 0.00            | 0.00 ± 0.00           | 0.00 ± 0.00           |             | 0.00 ± 0.00        | 0.01 ± 0.00            | 0.08 ± 0.08           | 0.19 ± 0.08           | ***  |
| Actinobacteria  | Geothrix          | 0.00 ± 0.00        | 0.00 ± 0.00            | 0.00 ± 0.00           | 0.00 ± 0.00           |             | 0.00 ± 0.00        | 0.00 ± 0.00            | 0.01 ± 0.01           | 0.00 ± 0.00           |             | 0.07 ± 0.05        | 0.36 ± 0.09            | 0.22 ± 0.11           | 0.05 ± 0.05           | *    |
|                 | Ilumatobacter     | 0.00 ± 0.00        | 0.00 ± 0.00            | 0.06 ± 0.06           | 0.25 ± 0.04           | **          | 0.00 ± 0.00        | 0.00 ± 0.00            | 0.01 ± 0.01           | 0.22 ± 0.13           |             | 0.00 ± 0.00        | 0.00 ± 0.00            | 0.01 ± 0.01           | 0.18 ± 0.05           | ***  |
|                 | Phycococcus       | 0.00 ± 0.00        | 0.00 ± 0.00            | 0.00 ± 0.00           | 0.44 ± 0.15           | **          | 0.00 ± 0.00        | 0.00 ± 0.00            | 0.10 ± 0.10           | 4.61 ± 4.27           |             | 0.00 ± 0.00        | 0.00 ± 0.00            | 0.02 ± 0.02           | 0.07 ± 0.03           | ***  |
|                 | Arthrobacter      | 0.00 ± 0.00        | 0.04 ± 0.01            | 0.07 ± 0.02           | 4.85 ± 1.23           | ***         | 0.20 ± 0.19        | 0.22 ± 0.17            | 0.32 ± 0.28           | 3.16 ± 0.51           | ***         | 0.15 ± 0.12        | 0.26 ± 0.12            | 3.02 ± 1.62           | 1.37 ± 0.53           | *    |
|                 | Mycobacterium     | 0.71 ± 0.20        | 1.68 ± 0.76            | 3.44 ± 0.95           | 0.90 ± 0.16           |             | 1.10 ± 0.17        | 1.44 ± 0.42            | 1.00 ± 0.19           | 1.30 ± 0.34           |             | 0.78 ± 0.54        | 1.31 ± 0.50            | 2.15 ± 0.44           | 1.05 ± 0.58           | *    |
|                 | Marmoricola       | 0.02 ± 0.02        | 0.10 ± 0.04            | 0.09 ± 0.02           | 0.31 ± 0.02           | ***         | 0.11 ± 0.11        | 0.25 ± 0.09            | 0.35 ± 0.24           | 0.34 ± 0.07           | *           | 0.09 ± 0.07        | 0.17 ± 0.05            | 2.16 ± 1.74           | 0.71 ± 0.41           | *    |
|                 | Nocardiodides     | 0.00 ± 0.00        | 0.01 ± 0.01            | 0.20 ± 0.20           | 1.25 ± 0.34           | **          | 0.00 ± 0.00        | 0.01 ± 0.00            | 0.07 ± 0.07           | 0.67 ± 0.45           |             | 0.01 ± 0.00        | 0.00 ± 0.00            | 0.61 ± 0.61           | 0.44 ± 0.17           |      |
| Armatimonadetes | Streptomyces      | 0.01 ± 0.01        | 0.01 ± 0.01            | 0.25 ± 0.23           | 0.10 ± 0.03           |             | 0.02 ± 0.01        | 0.68 ± 0.61            | 7.24 ± 3.76           | 0.05 ± 0.02           | *           | 0.18 ± 0.18        | 0.26 ± 0.16            | 1.19 ± 0.65           | 0.10 ± 0.05           |      |
|                 | Conexibacter      | 0.07 ± 0.01        | 0.17 ± 0.04            | 0.42 ± 0.13           | 0.01 ± 0.01           | *           | 0.15 ± 0.04        | 0.13 ± 0.05            | 0.06 ± 0.04           | 0.01 ± 0.00           |             | 0.01 ± 0.01        | 0.05 ± 0.02            | 0.02 ± 0.02           | 0.02 ± 0.00           |      |
|                 | gp5               | 0.19 ± 0.06        | 0.39 ± 0.08            | 0.40 ± 0.13           | 0.60 ± 0.18           |             | 0.26 ± 0.02        | 0.47 ± 0.13            | 0.31 ± 0.13           | 0.78 ± 0.24           |             | 0.23 ± 0.11        | 0.58 ± 0.11            | 0.43 ± 0.20           | 0.56 ± 0.05           | *    |
|                 | Ohtaekwangia      | 0.03 ± 0.02        | 0.05 ± 0.01            | 0.20 ± 0.11           | 1.50 ± 0.56           | *           | 0.09 ± 0.03        | 0.17 ± 0.10            | 0.62 ± 0.52           | 0.42 ± 0.19           |             | 0.12 ± 0.05        | 0.37 ± 0.11            | 0.22 ± 0.12           | 0.46 ± 0.09           | **   |
|                 | Fluviicola        | 0.00 ± 0.00        | 0.02 ± 0.02            | 0.00 ± 0.00           | 0.12 ± 0.04           | *           | 0.00 ± 0.00        | 0.15 ± 0.15            | 0.21 ± 0.21           | 0.72 ± 0.71           |             | 0.00 ± 0.00        | 0.00 ± 0.00            | 0.01 ± 0.01           | 0.02 ± 0.02           | **   |
|                 | Chitinophaga      | 0.05 ± 0.02        | 0.01 ± 0.01            | 0.02 ± 0.02           | 0.61 ± 0.17           | **          | 0.13 ± 0.05        | 0.73 ± 0.68            | 6.76 ± 2.33           | 0.63 ± 0.61           | ***         | 0.05 ± 0.03        | 0.03 ± 0.01            | 0.08 ± 0.03           | 0.02 ± 0.00           |      |
|                 | Ferruginibacter   | 0.04 ± 0.02        | 0.12 ± 0.04            | 0.13 ± 0.04           | 2.94 ± 0.62           | ***         | 0.07 ± 0.05        | 0.18 ± 0.04            | 1.09 ± 0.89           | 6.68 ± 2.94           | **          | 0.07 ± 0.05        | 0.08 ± 0.04            | 0.48 ± 0.46           | 2.59 ± 0.57           | ***  |
| Bacteroidetes   | Terrimonas        | 0.00 ± 0.00        | 0.00 ± 0.00            | 0.02 ± 0.02           | 0.23 ± 0.07           | **          | 0.00 ± 0.00        | 0.00 ± 0.00            | 0.07 ± 0.07           | 0.25 ± 0.14           | *           | 0.02 ± 0.02        | 0.00 ± 0.00            | 0.08 ± 0.08           | 1.79 ± 0.08           | ***  |
|                 | Mucilagibacter    | 0.82 ± 0.11        | 4.37 ± 1.19            | 2.47 ± 0.72           | 0.14 ± 0.01           | **          | 4.23 ± 3.72        | 8.30 ± 1.50            | 3.86 ± 0.98           | 0.21 ± 0.12           | **          | 0.94 ± 0.77        | 4.09 ± 1.20            | 2.45 ± 0.64           | 0.15 ± 0.04           | **   |
|                 | Penobacter        | 0.00 ± 0.00        | 0.06 ± 0.02            | 0.02 ± 0.01           | 0.24 ± 0.10           | *           | 0.00 ± 0.00        | 0.57 ± 0.56            | 1.92 ± 0.96           | 0.07 ± 0.01           | *           | 0.02 ± 0.02        | 0.12 ± 0.05            | 0.16 ± 0.14           | 0.07 ± 0.05           |      |
|                 | Nitrospira        | 0.02 ± 0.02        | 0.03 ± 0.03            | 0.12 ± 0.12           | 1.04 ± 0.07           | ***         | 0.12 ± 0.05        | 0.01 ± 0.01            | 0.26 ± 0.26           | 0.20 ± 0.13           |             | 0.40 ± 0.20        | 0.13 ± 0.05            | 0.36 ± 0.23           | 1.37 ± 0.40           | **   |
|                 | Brevundimonas     | 0.00 ± 0.00        | 0.00 ± 0.00            | 0.00 ± 0.00           | 0.14 ± 0.10           |             | 0.00 ± 0.00        | 0.04 ± 0.03            | 0.11 ± 0.09           | 0.37 ± 0.04           | ***         | 0.00 ± 0.00        | 0.00 ± 0.00            | 0.07 ± 0.07           | 0.19 ± 0.05           | ***  |
|                 | Phenyllobacterium | 1.15 ± 0.09        | 2.29 ± 0.47            | 1.95 ± 0.57           | 0.39 ± 0.10           | *           | 0.93 ± 0.32        | 2.15 ± 0.67            | 1.16 ± 0.50           | 0.35 ± 0.17           | *           | 0.90 ± 0.57        | 3.01 ± 0.06            | 1.44 ± 0.43           | 0.64 ± 0.12           | ***  |
|                 | Afipia            | 0.00 ± 0.00        | 0.02 ± 0.01            | 0.02 ± 0.01           | 0.49 ± 0.18           | **          | 0.00 ± 0.00        | 0.02 ± 0.01            | 0.24 ± 0.24           | 0.56 ± 0.17           | ***         | 0.01 ± 0.01        | 0.03 ± 0.03            | 0.15 ± 0.11           | 0.22 ± 0.03           | ***  |
| Proteobacteria  | Bosea             | 0.00 ± 0.00        | 0.00 ± 0.00            | 0.00 ± 0.00           | 0.50 ± 0.23           | *           | 0.00 ± 0.00        | 0.00 ± 0.00            | 0.33 ± 0.14           | 0.49 ± 0.15           | **          | 0.00 ± 0.00        | 0.01 ± 0.01            | 0.20 ± 0.20           | 0.59 ± 0.22           | ***  |
|                 | Bradyrhizobium    | 0.68 ± 0.27        | 0.71 ± 0.20            | 1.03 ± 0.34           | 0.16 ± 0.07           |             | 0.68 ± 0.23        | 0.82 ± 0.25            | 0.99 ± 0.37           | 0.51 ± 0.05           |             | 0.49 ± 0.10        | 0.60 ± 0.11            | 0.87 ± 0.39           | 0.19 ± 0.09           | **   |
|                 | Devosia           | 0.00 ± 0.00        | 0.01 ± 0.00            | 0.00 ± 0.00           | 0.60 ± 0.10           | ***         | 0.00 ± 0.00        | 0.01 ± 0.00            | 0.91 ± 0.52           | 0.75 ± 0.42           |             | 0.00 ± 0.00        | 0.02 ± 0.01            | 0.19 ± 0.18           | 0.86 ± 0.12           | ***  |
|                 | Hypomicrobium     | 0.00 ± 0.00        | 0.00 ± 0.00            | 0.01 ± 0.01           | 0.73 ± 0.31           | *           | 0.00 ± 0.00        | 0.00 ± 0.00            | 0.14 ± 0.08           | 0.43 ± 0.18           | **          | 0.00 ± 0.00        | 0.02 ± 0.01            | 0.01 ± 0.01           | 0.10 ± 0.05           | *    |
|                 | Rhizobium         | 0.00 ± 0.00        | 0.01 ± 0.01            | 0.04 ± 0.03           | 0.03 ± 0.01           |             | 0.00 ± 0.00        | 0.20 ± 0.18            | 1.09 ± 0.81           | 0.04 ± 0.02           |             | 0.01 ± 0.01        | 0.05 ± 0.01            | 0.04 ± 0.01           | 0.03 ± 0.02           | *    |
|                 | Novosphingobium   | 0.00 ± 0.00        | 0.03 ± 0.02            | 0.03 ± 0.02           | 0.54 ± 0.09           | ***         | 0.00 ± 0.00        | 0.02 ± 0.01            | 0.07 ± 0.04           | 0.92 ± 0.43           | *           | 0.02 ± 0.02        | 0.09 ± 0.02            | 0.11 ± 0.05           | 3.67 ± 3.44           | *    |
|                 | Sphingomonas      | 0.01 ± 0.01        | 0.05 ± 0.02            | 0.07 ± 0.01           | 2.64 ± 0.78           | **          | 0.00 ± 0.00        | 0.33 ± 0.30            | 0.80 ± 0.32           | 0.64 ± 0.33           | *           | 0.06 ± 0.06        | 0.08 ± 0.03            | 0.55 ± 0.53           | 1.08 ± 0.42           | **   |
|                 | Burkholderia      | 0.66 ± 0.03        | 3.50 ± 0.54            | 2.60 ± 0.73           | 0.15 ± 0.03           | **          | 1.11 ± 0.70        | 2.62 ± 0.73            | 2.49 ± 0.71           | 1.10 ± 0.03           | ***         | 0.89 ± 0.50        | 1.20 ± 0.13            | 1.28 ± 0.38           | 0.15 ± 0.06           | **   |
|                 | Aquabacterium     | 0.00 ± 0.00        | 0.01 ± 0.01            | 0.04 ± 0.04           | 0.34 ± 0.04           | ***         | 0.00 ± 0.00        | 0.02 ± 0.01            | 0.02 ± 0.00           | 0.18 ± 0.09           |             | 0.03 ± 0.03        | 0.03 ± 0.01            | 0.02 ± 0.02           | 0.27 ± 0.04           | **   |
|                 | Collimonas        | 0.03 ± 0.01        | 0.21 ± 0.16            | 0.21 ± 0.05           | 0.01 ± 0.01           |             | 0.07 ± 0.06        | 0.07 ± 0.01            | 0.24 ± 0.12           | 0.00 ± 0.00           |             | 0.30 ± 0.29        | 0.50 ± 0.16            | 0.44 ± 0.26           | 0.03 ± 0.02           | *    |
|                 | Massilia          | 0.00 ± 0.00        | 0.01 ± 0.01            | 0.01 ± 0.00           | 0.29 ± 0.15           |             | 0.00 ± 0.00        | 0.01 ± 0.00            | 0.01 ± 0.01           | 0.15 ± 0.06           | *           | 0.00 ± 0.00        | 0.02 ± 0.01            | 0.08 ± 0.06           | 0.21 ± 0.08           | **   |
|                 | Nitrospiro        | 0.00 ± 0.00        | 0.00 ± 0.00            | 0.00 ± 0.00           | 0.12 ± 0.08           |             | 0.00 ± 0.00        | 0.00 ± 0.00            | 0.50 ± 0.50           | 0.52 ± 0.14           | *           | 0.00 ± 0.00        | 0.00 ± 0.00            | 0.01 ± 0.01           | 0.07 ± 0.05           |      |
|                 | Rhizobactera      | 0.01 ± 0.01        | 0.03 ± 0.01            | 0.07 ± 0.06           | 0.47 ± 0.02           | ***         | 0.01 ± 0.01        | 0.03 ± 0.01            | 0.02 ± 0.02           | 0.24 ± 0.01           | *           | 0.02 ± 0.02        | 0.05 ± 0.02            | 0.24 ± 0.19           | 0.51 ± 0.14           | ***  |
|                 | Nevskia           | 0.04 ± 0.00        | 1.05 ± 0.55            | 0.86 ± 0.30           | 0.16 ± 0.03           |             | 2.06 ± 1.99        | 1.83 ± 0.72            | 1.24 ± 0.50           | 0.02 ± 0.02           | *           | 0.85 ± 0.83        | 2.78 ± 0.73            | 2.98 ± 1.19           | 4.44 ± 2.10           | *    |
|                 | Singularimonas    | 0.00 ± 0.00        | 0.00 ± 0.00            | 0.01 ± 0.01           | 0.25 ± 0.06           | **          | 0.00 ± 0.00        | 0.00 ± 0.00            | 0.00 ± 0.00           | 0.01 ± 0.01           |             | 0.00 ± 0.00        | 0.00 ± 0.00            | 0.02 ± 0.02           | 0.33 ± 0.27           |      |
|                 | Steroidobacter    | 0.04 ± 0.01        | 0.28 ± 0.12            | 0.45 ± 0.13           | 0.08 ± 0.03           | **          | 0.04 ± 0.02        | 0.18 ± 0.08            | 0.04 ± 0.01           | 0.00 ± 0.00           | *           | 0.10 ± 0.02        | 0.27 ± 0.11            | 0.21 ± 0.08           | 0.13 ± 0.06           | *    |
|                 | Arenimonas        | 0.01 ± 0.01        | 0.00 ± 0.00            | 0.04 ± 0.04           | 0.52 ± 0.10           | ***         | 0.01 ± 0.00        | 0.01 ± 0.00            | 0.51 ± 0.51           | 0.76 ± 0.37           | *           | 0.03 ± 0.01        | 0.01 ± 0.01            | 1.03 ± 1.02           | 0.93 ± 0.38           | *    |
| Dakdonella      | 0.00 ± 0.00       | 0.08 ± 0.04        | 0.13 ± 0.04            | 0.01 ± 0.01           | *                     | 0.19 ± 0.17 | 0.52 ± 0.29        | 0.74 ± 0.33            | 0.01 ± 0.00           | ***                   | 0.01 ± 0.01 | 0.05 ± 0.01        | 0.26 ± 0.10            | 0.03 ± 0.02           | *                     |      |
| Dyella          | 0.32 ± 0.01       | 0.76 ± 0.18        | 1.46 ± 0.61            | 0.07 ± 0.01           |                       | 1.49 ± 0.85 | 1.44 ± 0.08        | 0.97 ± 0.16            | 0.18 ± 0.02           | **                    | 0.34 ± 0.23 | 0.39 ± 0.10        | 0.49 ± 0.14            | 0.03 ± 0.03           | **                    |      |

Table.S2. Relative abundance (in %) of the major bacterial genera (>0.25%) that varied significantly between the three soil types (beech, coppice with standards and corsican pine) in bulk soil, obsidian, apatite and calcite samples. Each value is the mean of biological replicates ( $\pm$  Standard Error of the Mean).

| phylum         | genus            | BULK       |            |            |            |            |            | OBSIDIAN |            |            |            |            |            | APATITE    |      |            |            |            |            | CALCITE    |            |      |            |            |            |            |            |            |      |
|----------------|------------------|------------|------------|------------|------------|------------|------------|----------|------------|------------|------------|------------|------------|------------|------|------------|------------|------------|------------|------------|------------|------|------------|------------|------------|------------|------------|------------|------|
|                |                  | BEECH      |            | COPPICE    |            | PINE       |            | pval     | BEECH      |            | COPPICE    |            | PINE       |            | pval | BEECH      |            | COPPICE    |            | PINE       |            | pval | BEECH      |            | COPPICE    |            | PINE       |            | Pval |
|                |                  | mean       | sem        | mean       | sem        | mean       | sem        |          | mean       | sem        | mean       | sem        | mean       | sem        |      | mean       | sem        | mean       | sem        | mean       | sem        |      | mean       | sem        | mean       | sem        | mean       | sem        |      |
| Acidobacteria  | Gp1              | 13.41      | $\pm$ 0.97 | 9.86       | $\pm$ 0.47 | 6.95       | $\pm$ 1.13 | **       | 5.48       | $\pm$ 0.44 | 5.85       | $\pm$ 1.11 | 5.61       | $\pm$ 0.38 | *    | 7.04       | $\pm$ 1.66 | 3.11       | $\pm$ 1.08 | 5.23       | $\pm$ 0.89 | *    | 0.58       | $\pm$ 0.11 | 0.77       | $\pm$ 0.28 | 1.03       | $\pm$ 0.32 |      |
|                | Gp10             | 0.30       | $\pm$ 0.21 | 0.59       | $\pm$ 0.18 | 0.95       | $\pm$ 0.08 |          | 0.10       | $\pm$ 0.02 | 0.25       | $\pm$ 0.12 | 0.61       | $\pm$ 0.13 | *    | 0.20       | $\pm$ 0.05 | 0.09       | $\pm$ 0.06 | 1.29       | $\pm$ 0.41 | *    | 0.16       | $\pm$ 0.07 | 0.02       | $\pm$ 0.01 | 0.09       | $\pm$ 0.03 |      |
|                | Gp13             | 0.10       | $\pm$ 0.06 | 0.15       | $\pm$ 0.05 | 0.32       | $\pm$ 0.00 |          | 0.01       | $\pm$ 0.01 | 0.01       | $\pm$ 0.01 | 0.06       | $\pm$ 0.01 | *    | 0.01       | $\pm$ 0.01 | 0.00       | $\pm$ 0.00 | 0.07       | $\pm$ 0.01 | ***  | 0.00       | $\pm$ 0.00 | 0.00       | $\pm$ 0.00 | 0.01       | $\pm$ 0.01 |      |
|                | Gp2              | 25.61      | $\pm$ 1.63 | 17.95      | $\pm$ 1.58 | 24.09      | $\pm$ 0.56 | *        | 3.55       | $\pm$ 0.64 | 2.83       | $\pm$ 0.57 | 6.32       | $\pm$ 0.89 | *    | 5.36       | $\pm$ 0.76 | 1.23       | $\pm$ 0.50 | 5.61       | $\pm$ 0.50 | ***  | 0.52       | $\pm$ 0.07 | 0.67       | $\pm$ 0.24 | 2.15       | $\pm$ 0.63 |      |
|                | Gp3              | 0.95       | $\pm$ 0.10 | 0.95       | $\pm$ 0.03 | 0.99       | $\pm$ 0.24 |          | 0.17       | $\pm$ 0.08 | 0.15       | $\pm$ 0.02 | 0.38       | $\pm$ 0.07 | *    | 0.29       | $\pm$ 0.09 | 0.09       | $\pm$ 0.05 | 0.39       | $\pm$ 0.08 | *    | 0.02       | $\pm$ 0.01 | 0.05       | $\pm$ 0.02 | 0.13       | $\pm$ 0.06 |      |
|                | Gp5              | 0.88       | $\pm$ 0.07 | 0.77       | $\pm$ 0.06 | 0.65       | $\pm$ 0.11 |          | 0.58       | $\pm$ 0.15 | 0.33       | $\pm$ 0.06 | 0.69       | $\pm$ 0.10 | *    | 0.69       | $\pm$ 0.14 | 0.24       | $\pm$ 0.07 | 0.67       | $\pm$ 0.10 | *    | 1.11       | $\pm$ 0.17 | 0.79       | $\pm$ 0.10 | 0.68       | $\pm$ 0.11 |      |
| Actinobacteria | Geothrix         | 0.00       | $\pm$ 0.00 | 0.00       | $\pm$ 0.00 | 0.01       | $\pm$ 0.01 |          | 0.00       | $\pm$ 0.00 | 0.00       | $\pm$ 0.00 | 0.33       | $\pm$ 0.10 | **   | 0.00       | $\pm$ 0.00 | 0.01       | $\pm$ 0.01 | 0.30       | $\pm$ 0.08 | **   | 0.00       | $\pm$ 0.00 | 0.00       | $\pm$ 0.00 | 0.04       | $\pm$ 0.04 |      |
|                | Actinospica      | 0.10       | $\pm$ 0.03 | 0.25       | $\pm$ 0.05 | 0.04       | $\pm$ 0.02 | *        | 0.51       | $\pm$ 0.37 | 0.66       | $\pm$ 0.23 | 0.22       | $\pm$ 0.13 |      | 1.10       | $\pm$ 0.69 | 0.50       | $\pm$ 0.22 | 0.09       | $\pm$ 0.05 |      | 0.02       | $\pm$ 0.01 | 0.52       | $\pm$ 0.40 | 0.03       | $\pm$ 0.01 |      |
|                | Mycobacterium    | 0.71       | $\pm$ 0.20 | 0.85       | $\pm$ 0.10 | 0.21       | $\pm$ 0.04 | **       | 1.68       | $\pm$ 0.76 | 1.62       | $\pm$ 0.35 | 1.08       | $\pm$ 0.29 |      | 3.44       | $\pm$ 0.95 | 0.78       | $\pm$ 0.04 | 2.43       | $\pm$ 0.42 | *    | 0.90       | $\pm$ 0.16 | 1.37       | $\pm$ 0.25 | 1.19       | $\pm$ 0.43 |      |
|                | Marmoricola      | 0.02       | $\pm$ 0.02 | 0.00       | $\pm$ 0.00 | 0.02       | $\pm$ 0.01 |          | 0.10       | $\pm$ 0.04 | 0.31       | $\pm$ 0.07 | 0.15       | $\pm$ 0.04 | *    | 0.09       | $\pm$ 0.02 | 0.11       | $\pm$ 0.02 | 0.40       | $\pm$ 0.16 |      | 0.31       | $\pm$ 0.02 | 0.52       | $\pm$ 0.18 | 2.37       | $\pm$ 1.68 |      |
|                | Sporichthya      | 0.01       | $\pm$ 0.01 | 0.00       | $\pm$ 0.00 | 0.01       | $\pm$ 0.01 |          | 0.08       | $\pm$ 0.05 | 0.13       | $\pm$ 0.05 | 0.06       | $\pm$ 0.01 |      | 0.06       | $\pm$ 0.01 | 0.03       | $\pm$ 0.02 | 0.49       | $\pm$ 0.21 | *    | 0.33       | $\pm$ 0.15 | 0.04       | $\pm$ 0.03 | 0.77       | $\pm$ 0.31 |      |
| Bacteroidetes  | Conexibacter     | 0.07       | $\pm$ 0.01 | 0.12       | $\pm$ 0.04 | 0.00       | $\pm$ 0.00 | *        | 0.17       | $\pm$ 0.04 | 0.16       | $\pm$ 0.04 | 0.04       | $\pm$ 0.02 |      | 0.42       | $\pm$ 0.13 | 0.03       | $\pm$ 0.01 | 0.03       | $\pm$ 0.02 | **   | 0.01       | $\pm$ 0.01 | 0.05       | $\pm$ 0.04 | 0.01       | $\pm$ 0.01 |      |
|                | Ohtaekwangia     | 0.03       | $\pm$ 0.02 | 0.06       | $\pm$ 0.02 | 0.06       | $\pm$ 0.04 |          | 0.05       | $\pm$ 0.01 | 0.09       | $\pm$ 0.04 | 0.38       | $\pm$ 0.10 | **   | 0.20       | $\pm$ 0.11 | 0.18       | $\pm$ 0.09 | 0.13       | $\pm$ 0.05 |      | 1.50       | $\pm$ 0.56 | 0.86       | $\pm$ 0.46 | 0.48       | $\pm$ 0.07 |      |
|                | Chitinophaga     | 0.05       | $\pm$ 0.02 | 0.15       | $\pm$ 0.03 | 0.01       | $\pm$ 0.01 | **       | 0.01       | $\pm$ 0.01 | 0.05       | $\pm$ 0.02 | 0.05       | $\pm$ 0.02 |      | 0.02       | $\pm$ 0.02 | 7.35       | $\pm$ 1.80 | 0.04       | $\pm$ 0.01 | ***  | 0.61       | $\pm$ 0.17 | 0.57       | $\pm$ 0.44 | 0.06       | $\pm$ 0.04 |      |
|                | Ferruginibacter  | 0.04       | $\pm$ 0.02 | 0.01       | $\pm$ 0.01 | 0.08       | $\pm$ 0.04 |          | 0.12       | $\pm$ 0.04 | 0.17       | $\pm$ 0.03 | 0.08       | $\pm$ 0.04 |      | 0.13       | $\pm$ 0.04 | 0.21       | $\pm$ 0.04 | 0.02       | $\pm$ 0.01 | **   | 2.94       | $\pm$ 0.62 | 5.95       | $\pm$ 2.20 | 2.41       | $\pm$ 0.44 |      |
|                | Terrimonas       | 0.00       | $\pm$ 0.00 | 0.00       | $\pm$ 0.00 | 0.03       | $\pm$ 0.02 |          | 0.00       | $\pm$ 0.00 | 0.00       | $\pm$ 0.00 | 0.00       | $\pm$ 0.00 |      | 0.02       | $\pm$ 0.02 | 0.00       | $\pm$ 0.00 | 0.00       | $\pm$ 0.00 |      | 0.23       | $\pm$ 0.07 | 0.25       | $\pm$ 0.10 | 1.42       | $\pm$ 0.38 |      |
| Nitrospirae    | Mucilaginibacter | 0.82       | $\pm$ 0.11 | 0.48       | $\pm$ 0.03 | 0.14       | $\pm$ 0.05 | **       | 4.37       | $\pm$ 1.19 | 8.44       | $\pm$ 1.59 | 4.36       | $\pm$ 1.02 |      | 2.47       | $\pm$ 0.72 | 6.39       | $\pm$ 1.58 | 2.65       | $\pm$ 0.46 | *    | 0.14       | $\pm$ 0.01 | 0.40       | $\pm$ 0.21 | 0.27       | $\pm$ 0.12 |      |
|                | Pedobacter       | 0.00       | $\pm$ 0.00 | 0.00       | $\pm$ 0.00 | 0.00       | $\pm$ 0.00 |          | 0.06       | $\pm$ 0.02 | 0.01       | $\pm$ 0.01 | 0.13       | $\pm$ 0.04 | *    | 0.02       | $\pm$ 0.01 | 2.26       | $\pm$ 0.90 | 0.02       | $\pm$ 0.00 | *    | 0.24       | $\pm$ 0.10 | 0.27       | $\pm$ 0.21 | 0.20       | $\pm$ 0.14 |      |
|                | Nitrospira       | 0.02       | $\pm$ 0.02 | 0.13       | $\pm$ 0.04 | 0.57       | $\pm$ 0.12 | **       | 0.03       | $\pm$ 0.03 | 0.01       | $\pm$ 0.01 | 0.13       | $\pm$ 0.05 |      | 0.12       | $\pm$ 0.12 | 0.01       | $\pm$ 0.01 | 0.13       | $\pm$ 0.05 |      | 1.04       | $\pm$ 0.07 | 0.41       | $\pm$ 0.23 | 1.29       | $\pm$ 0.30 |      |
|                | Phenylobacterium | 1.15       | $\pm$ 0.09 | 0.75       | $\pm$ 0.15 | 0.29       | $\pm$ 0.05 | **       | 2.29       | $\pm$ 0.47 | 2.24       | $\pm$ 0.63 | 2.73       | $\pm$ 0.23 |      | 1.95       | $\pm$ 0.57 | 0.84       | $\pm$ 0.26 | 2.18       | $\pm$ 0.36 |      | 0.39       | $\pm$ 0.10 | 0.89       | $\pm$ 0.55 | 0.54       | $\pm$ 0.13 |      |
|                | Bradyrhizobium   | 0.68       | $\pm$ 0.27 | 0.43       | $\pm$ 0.02 | 0.44       | $\pm$ 0.12 |          | 0.71       | $\pm$ 0.20 | 0.73       | $\pm$ 0.18 | 0.48       | $\pm$ 0.05 |      | 1.03       | $\pm$ 0.34 | 1.07       | $\pm$ 0.39 | 1.09       | $\pm$ 0.27 |      | 0.16       | $\pm$ 0.07 | 0.68       | $\pm$ 0.17 | 0.14       | $\pm$ 0.08 |      |
| Proteobacteria | Rhizobium        | 0.00       | $\pm$ 0.00 | 0.00       | $\pm$ 0.00 | 0.00       | $\pm$ 0.00 |          | 0.01       | $\pm$ 0.01 | 0.01       | $\pm$ 0.01 | 0.05       | $\pm$ 0.01 | *    | 0.04       | $\pm$ 0.03 | 1.28       | $\pm$ 0.75 | 0.05       | $\pm$ 0.01 |      | 0.03       | $\pm$ 0.01 | 0.03       | $\pm$ 0.02 | 0.02       | $\pm$ 0.01 |      |
|                | Acidocella       | 0.03       | $\pm$ 0.01 | 0.00       | $\pm$ 0.00 | 0.00       | $\pm$ 0.00 | *        | 0.03       | $\pm$ 0.02 | 0.02       | $\pm$ 0.01 | 0.16       | $\pm$ 0.15 |      | 0.01       | $\pm$ 0.01 | 0.04       | $\pm$ 0.03 | 0.38       | $\pm$ 0.30 |      | 0.01       | $\pm$ 0.01 | 0.00       | $\pm$ 0.00 | 0.00       | $\pm$ 0.00 |      |
|                | Dongia           | 0.00       | $\pm$ 0.00 | 0.00       | $\pm$ 0.00 | 0.01       | $\pm$ 0.01 |          | 0.01       | $\pm$ 0.01 | 0.02       | $\pm$ 0.00 | 0.00       | $\pm$ 0.00 | *    | 0.13       | $\pm$ 0.13 | 0.00       | $\pm$ 0.00 | 0.00       | $\pm$ 0.00 |      | 0.08       | $\pm$ 0.02 | 0.10       | $\pm$ 0.05 | 0.29       | $\pm$ 0.25 |      |
|                | Novosphingobium  | 0.00       | $\pm$ 0.00 | 0.00       | $\pm$ 0.00 | 0.00       | $\pm$ 0.00 |          | 0.03       | $\pm$ 0.02 | 0.02       | $\pm$ 0.01 | 0.10       | $\pm$ 0.01 | *    | 0.03       | $\pm$ 0.02 | 0.02       | $\pm$ 0.02 | 0.07       | $\pm$ 0.05 |      | 0.54       | $\pm$ 0.09 | 0.73       | $\pm$ 0.35 | 2.79       | $\pm$ 2.59 |      |
|                | Sphingomonas     | 0.01       | $\pm$ 0.01 | 0.00       | $\pm$ 0.00 | 0.00       | $\pm$ 0.00 |          | 0.05       | $\pm$ 0.02 | 0.03       | $\pm$ 0.01 | 0.12       | $\pm$ 0.03 | *    | 0.07       | $\pm$ 0.01 | 1.01       | $\pm$ 0.29 | 0.01       | $\pm$ 0.01 | **   | 2.64       | $\pm$ 0.78 | 0.58       | $\pm$ 0.24 | 1.35       | $\pm$ 0.40 |      |
|                | Burkholderia     | 0.66       | $\pm$ 0.03 | 0.42       | $\pm$ 0.03 | 0.33       | $\pm$ 0.20 |          | 3.50       | $\pm$ 0.54 | 2.09       | $\pm$ 0.34 | 1.34       | $\pm$ 0.20 | *    | 2.60       | $\pm$ 0.73 | 3.55       | $\pm$ 0.37 | 1.53       | $\pm$ 0.17 | *    | 0.15       | $\pm$ 0.03 | 0.17       | $\pm$ 0.07 | 0.17       | $\pm$ 0.04 |      |
|                | Aquabacterium    | 0.00       | $\pm$ 0.00 | 0.00       | $\pm$ 0.00 | 0.00       | $\pm$ 0.00 |          | 0.01       | $\pm$ 0.01 | 0.00       | $\pm$ 0.00 | 0.05       | $\pm$ 0.01 | *    | 0.04       | $\pm$ 0.04 | 0.03       | $\pm$ 0.01 | 0.00       | $\pm$ 0.00 |      | 0.34       | $\pm$ 0.04 | 0.14       | $\pm$ 0.08 | 0.22       | $\pm$ 0.06 |      |
|                | Rhizobacter      | 0.01       | $\pm$ 0.01 | 0.00       | $\pm$ 0.00 | 0.02       | $\pm$ 0.02 |          | 0.03       | $\pm$ 0.01 | 0.04       | $\pm$ 0.01 | 0.03       | $\pm$ 0.01 |      | 0.07       | $\pm$ 0.06 | 0.03       | $\pm$ 0.01 | 0.07       | $\pm$ 0.02 |      | 0.47       | $\pm$ 0.02 | 0.18       | $\pm$ 0.06 | 0.58       | $\pm$ 0.13 |      |
|                | Nevskia          | 0.04       | $\pm$ 0.00 | 0.07       | $\pm$ 0.03 | 0.02       | $\pm$ 0.01 |          | 1.05       | $\pm$ 0.55 | 3.01       | $\pm$ 1.22 | 2.27       | $\pm$ 0.44 |      | 0.86       | $\pm$ 0.30 | 1.42       | $\pm$ 0.46 | 4.11       | $\pm$ 0.70 | **   | 0.16       | $\pm$ 0.03 | 0.17       | $\pm$ 0.15 | 3.34       | $\pm$ 1.85 |      |
|                | Steroidobacter   | 0.04       | $\pm$ 0.01 | 0.02       | $\pm$ 0.01 | 0.07       | $\pm$ 0.02 |          | 0.28       | $\pm$ 0.12 | 0.19       | $\pm$ 0.08 | 0.29       | $\pm$ 0.10 |      | 0.45       | $\pm$ 0.13 | 0.05       | $\pm$ 0.01 | 0.21       | $\pm$ 0.08 | *    | 0.08       | $\pm$ 0.03 | 0.01       | $\pm$ 0.00 | 0.11       | $\pm$ 0.05 |      |
| Dokdonella     | 0.00             | $\pm$ 0.00 | 0.03       | $\pm$ 0.02 | 0.01       | $\pm$ 0.00 |            | 0.08     | $\pm$ 0.04 | 0.30       | $\pm$ 0.09 | 0.05       | $\pm$ 0.02 | *          | 0.13 | $\pm$ 0.04 | 1.07       | $\pm$ 0.25 | 0.26       | $\pm$ 0.09 | **         | 0.01 | $\pm$ 0.01 | 0.01       | $\pm$ 0.01 | 0.03       | $\pm$ 0.01 |            |      |
| Dyella         | 0.32             | $\pm$ 0.01 | 0.74       | $\pm$ 0.15 | 0.09       | $\pm$ 0.05 | **         | 0.76     | $\pm$ 0.18 | 1.89       | $\pm$ 0.43 | 0.43       | $\pm$ 0.14 | *          | 1.46 | $\pm$ 0.61 | 1.12       | $\pm$ 0.16 | 0.62       | $\pm$ 0.07 |            | 0.07 | $\pm$ 0.01 |            |            |            |            |            |      |

**Table.S3 (Part A). Pearson correlation between mineral chemistry and the relative abundance of the mineral-associated bacterial genera. The r-value is provided for significant correlations (\*\*P<0.01 and \*\*\*P<0.001).**

| Phylum           | Genus                 | SiO <sub>2</sub> | Al <sub>2</sub> O <sub>3</sub> | Fe <sub>2</sub> O <sub>3</sub> | MnO       | MgO       | CaO       | Na <sub>2</sub> O | K <sub>2</sub> O | TiO <sub>2</sub> | P <sub>2</sub> O <sub>5</sub> |
|------------------|-----------------------|------------------|--------------------------------|--------------------------------|-----------|-----------|-----------|-------------------|------------------|------------------|-------------------------------|
| Acidobacteria    | Gp1                   | 0.459**          | 0.457**                        | 0.501**                        | -0.693*** | 0.593***  | -0.483**  | 0.486**           | 0.454**          | 0.454**          |                               |
|                  | Gp2                   |                  |                                |                                | -0.563*** | 0.45**    |           |                   |                  |                  |                               |
|                  | Gp3                   |                  |                                |                                | -0.496**  |           |           |                   |                  |                  |                               |
|                  | Bryobacter            |                  |                                |                                | 0.462**   |           |           |                   |                  |                  |                               |
| Actinobacteria   | Ilumatobacter         |                  |                                | -0.457**                       | 0.647***  | -0.544*** | 0.44**    | -0.443**          |                  |                  |                               |
|                  | lamia                 |                  |                                |                                | 0.496**   |           |           |                   |                  |                  |                               |
|                  | Catenulispora         |                  |                                |                                | -0.531*** |           |           |                   |                  |                  |                               |
|                  | Terrabacter           |                  |                                | -0.426**                       | 0.701***  | -0.523**  |           |                   |                  |                  |                               |
|                  | Arthrobacter          |                  |                                | -0.443**                       | 0.591***  | -0.521**  | 0.428**   | -0.431**          |                  |                  |                               |
|                  | Allocatelliglobospora |                  |                                |                                |           |           |           |                   |                  |                  |                               |
|                  | Aeromicrobium         |                  |                                |                                | 0.474**   |           |           |                   |                  |                  |                               |
|                  | Nocardioides          |                  |                                |                                | 0.614***  | -0.498**  |           |                   |                  |                  |                               |
|                  | Pseudonocardia        |                  |                                |                                | 0.479**   |           |           |                   |                  |                  |                               |
| Streptomyces     |                       |                  |                                |                                |           |           |           |                   |                  | 0.441**          |                               |
| Bacteroidetes    | Ohtaekwangia          |                  |                                |                                | 0.547***  |           |           |                   |                  |                  |                               |
|                  | Ferruginibacter       |                  |                                |                                | 0.676***  | -0.504**  |           |                   |                  |                  |                               |
|                  | Lacibacter            |                  |                                |                                | 0.55***   |           |           |                   |                  |                  |                               |
|                  | Terrimonas            |                  |                                |                                | 0.559***  |           |           |                   |                  |                  |                               |
|                  | Hymenobacter          | 0.43**           | 0.429**                        | 0.441**                        |           | 0.46**    | -0.437**  | 0.438**           | 0.429**          | 0.429**          |                               |
|                  | Mucilagibacter        | 0.546***         | 0.544***                       | 0.575***                       | -0.528*** | 0.635***  | -0.562*** | 0.565***          | 0.542***         | 0.542***         |                               |
| Solitalea        |                       |                  | 0.429**                        |                                | 0.456**   |           | 0.424**   |                   |                  |                  |                               |
| Elusimicrobia    | Elusimicrobium        |                  |                                | 0.429**                        |           | 0.438**   | -0.426**  | 0.427**           |                  |                  |                               |
| Firmicutes       | Paenibacillus         |                  |                                |                                |           | -0.442**  |           |                   |                  |                  |                               |
| Gemmatimonadetes | Gemmatimonas          |                  |                                |                                | 0.632***  | -0.478**  |           |                   |                  |                  |                               |

**Table.S3 (Part B). Pearson correlation between mineral chemistry and the relative abundance of the mineral-associated bacterial genera.** The r-value is provided for significant correlations (\*\*P<0.01 and \*\*\*P<0.001).

| Phylum                | Genus                | SiO <sub>2</sub> | Al <sub>2</sub> O <sub>3</sub> | Fe <sub>2</sub> O <sub>3</sub> | MnO       | MgO       | CaO      | Na <sub>2</sub> O | K <sub>2</sub> O | TiO <sub>2</sub> | P <sub>2</sub> O <sub>5</sub> |
|-----------------------|----------------------|------------------|--------------------------------|--------------------------------|-----------|-----------|----------|-------------------|------------------|------------------|-------------------------------|
| <b>Nitrospira</b>     | <b>Nitrospira</b>    |                  |                                | -0.459**                       | 0.712***  | -0.557*** | 0.44**   | -0.444**          |                  |                  |                               |
|                       | Rhizomicrobium       | 0.432**          | 0.431**                        | 0.439**                        |           | 0.449**   | -0.436** | 0.437**           | 0.431**          | 0.431**          |                               |
|                       | Brevundimonas        | -0.427**         | -0.425**                       | -0.47**                        | 0.703***  | -0.565*** | 0.451**  | -0.455**          |                  |                  |                               |
|                       | Phenylobacterium     | 0.556***         | 0.554***                       | 0.581***                       | -0.466**  | 0.63***   | -0.57*** | 0.572***          | 0.553***         | 0.553***         |                               |
|                       | Afipia               | -0.428**         | -0.425**                       | -0.472**                       | 0.719***  | -0.57***  | 0.453**  | -0.457**          |                  |                  |                               |
|                       | Bosea                | -0.464**         | -0.461**                       | -0.506**                       | 0.707***  | -0.601*** | 0.488**  | -0.492**          | -0.459**         | -0.459**         |                               |
|                       | Bradyrhizobium       |                  |                                |                                | -0.572*** |           |          |                   |                  |                  | 0.531***                      |
|                       | Devosia              | -0.433**         | -0.431**                       | -0.457**                       | 0.435**   | -0.508**  | 0.447**  | -0.449**          | -0.43**          | -0.43**          |                               |
|                       | Hyphomicrobium       |                  |                                |                                | 0.554***  | -0.44**   |          |                   |                  |                  |                               |
|                       | Labrys               |                  |                                |                                |           |           |          |                   |                  |                  |                               |
|                       | Rhodobacter          |                  |                                |                                | 0.46**    |           |          |                   |                  |                  |                               |
|                       | Sphingobium          |                  |                                |                                |           |           |          |                   |                  |                  |                               |
|                       | Sphingomonas         |                  |                                | -0.445**                       | 0.524**   | -0.512**  | 0.432**  | -0.435**          |                  |                  |                               |
|                       | Sphingopyxis         |                  |                                |                                | 0.487**   |           |          |                   |                  |                  |                               |
|                       | Burkholderia         |                  |                                |                                | -0.724*** | 0.469**   |          |                   |                  |                  | 0.436**                       |
| <b>Proteobacteria</b> | <b>Aquabacterium</b> |                  |                                | -0.447**                       | 0.712***  | -0.546*** | 0.428**  | -0.432**          |                  |                  |                               |
|                       | Polaromonas          |                  |                                |                                | 0.494**   |           |          |                   |                  |                  |                               |
|                       | Collimonas           |                  |                                |                                | -0.487**  |           |          |                   |                  |                  |                               |
|                       | Massilia             |                  |                                |                                | 0.635***  | -0.452**  |          |                   |                  |                  |                               |
|                       | Nitrospira           |                  |                                |                                | 0.443**   |           |          |                   |                  |                  |                               |
|                       | Sulfuritalea         |                  |                                |                                | 0.593***  | -0.443**  |          |                   |                  |                  |                               |
|                       | Peredibacter         |                  |                                |                                | 0.479**   |           |          |                   |                  |                  |                               |
|                       | Acinetobacter        |                  |                                |                                | 0.484**   |           |          |                   |                  |                  |                               |
|                       | Rhizobacter          | -0.438**         | -0.435**                       | -0.482**                       | 0.721***  | -0.58***  | 0.463**  | -0.466**          | -0.432**         | -0.432**         |                               |
|                       | Singularimonas       |                  |                                |                                | 0.439**   |           |          |                   |                  |                  |                               |
|                       | Steroidobacter       |                  |                                |                                |           |           |          |                   |                  |                  |                               |
|                       | Arenimonas           |                  |                                |                                | 0.598***  | -0.45**   |          |                   |                  |                  |                               |
|                       | Dokdonella           |                  |                                |                                | -0.511**  |           |          |                   |                  |                  | 0.537***                      |
|                       | Dyella               |                  |                                |                                | -0.529*** |           |          |                   |                  |                  |                               |
| <b>Spirochaetes</b>   | <b>Turneriella</b>   |                  |                                |                                | 0.555***  |           |          |                   |                  |                  |                               |

**Table.S4. Relative abundance (in %) of the most abundant bacterial genera detected by cultivation-independent approach.** Each value is the mean of biological replicates. Bacterial genera in bold were also recovered in our cultivation -dependent approach.

| Rank | Genus                   | mean (in %) |
|------|-------------------------|-------------|
| 1    | Acidobacteria Gp2       | 7.02        |
| 2    | Acidobacteria Gp1       | 5.10        |
| 3    | Mucilaginibacter        | 2.72        |
| 4    | Nevskia                 | 1.47        |
| 5    | <b>Burkholderia</b>     | <b>1.44</b> |
| 6    | <b>Mycobacterium</b>    | <b>1.41</b> |
| 7    | <b>Serratia</b>         | <b>1.40</b> |
| 8    | <b>Phenylbacterium</b>  | <b>1.39</b> |
| 9    | <b>Arthrobacter</b>     | <b>1.11</b> |
| 10   | Ferruginibacter         | 1.08        |
| 11   | <b>Streptomyces</b>     | <b>0.89</b> |
| 12   | <b>Chitinophaga</b>     | <b>0.79</b> |
| 13   | <b>Dyella</b>           | <b>0.67</b> |
| 14   | Bryobacter              | 0.67        |
| 15   | Bradyrhizobium          | 0.65        |
| 16   | <b>Sphingomonas</b>     | <b>0.52</b> |
| 17   | TM7                     | 0.50        |
| 18   | <b>Chryseobacterium</b> | <b>0.49</b> |
| 19   | Armatimonadetes Gp5     | 0.43        |
| 20   | Marmoricola             | 0.39        |
| 21   | Novosphingobium         | 0.39        |
| 22   | Acidobacteria Gp10      | 0.37        |
| 23   | <b>Phycoccus</b>        | <b>0.36</b> |
| 24   | Ohtaekwangia            | 0.35        |
| 25   | Actinospica             | 0.35        |
| 26   | Acidobacteria Gp3       | 0.34        |
| 27   | Nitrospira              | 0.33        |
| 28   | Arenimonas              | 0.30        |
| 29   | Pedobacter              | 0.29        |
| 30   | Nocardioides            | 0.27        |
